# Supplementary material for: Carbon Nitride Quantum Dots Modified TiO2 Inverse Opal Photonic Crystal for Solving Indoor VOCs Pollution
Source: MDPI journal article supplement (doi:10.3390/catal11040464), 2021-04-02
Supplement: s1 [file s1]

---

# Carbon nitride quantum dots modified TiO<sub>2</sub> inverse opal photonic crystal for solving indoor VOCs pollution

Jie Yu<sup>1,2</sup>, Angel Caravaca<sup>2</sup>, Chantal Guillard<sup>2</sup>, Philippe Vernoux<sup>2</sup>, Liang Zhou<sup>1,3</sup>, Lingzhi Wang<sup>4</sup>, Juying Lei<sup>1,3,5,\*</sup>, Jinlong Zhang<sup>4</sup>, Yongdi Liu<sup>1,3,5,\*</sup>

1 National Engineering Laboratory for Industrial Wastewater Treatment, School of Resources and Environmental Engineering, East China University of Science and Technology, Shanghai, China

2 Univ Lyon, Université Claude Bernard Lyon 1, CNRS, IRCELYON, F-69626, Villeurbanne, France

3 State Environmental Protection Key Laboratory of Environmental Risk Assessment and Control on Chemical Process, School of Resources and Environmental Engineering, East China University of Science and Technology, Shanghai, P. R. China.

4 Key Lab for Advanced Materials and Institute of Fine Chemicals, East China University of Science and Technology, Shanghai, P. R. China.

5 Shanghai Institute of Pollution Control and Ecological Security, Shanghai, P.R. China.

\*E-mail: lejuying@ecust.edu.cn, ydliu@ecust.edu.cn

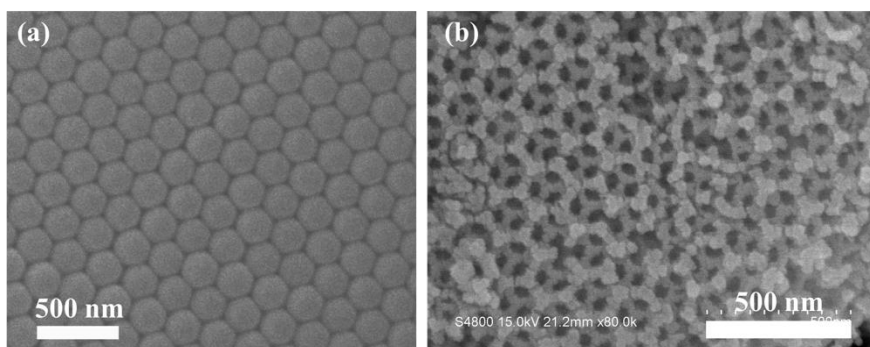

**Figure S1.** SEM image of (a) PS template (b) TiO<sub>2</sub> IO

**Table S1.** The comparison of the photocatalytic degradation efficiencies of toluene into CO<sub>2</sub> ( $\eta_t$ , toluene) over different samples

| Concentration (ppm)       | TCN IO | TiO <sub>2</sub> IO | P25  | bulk-TiO <sub>2</sub> |
|---------------------------|--------|---------------------|------|-----------------------|
| Initial CO <sub>2</sub>   | 498    | 487                 | 513  | 440                   |
| Final CO <sub>2</sub>     | 4675   | 4223                | 2156 | 3131                  |
| Generated CO <sub>2</sub> | 4177   | 3736                | 1643 | 2691                  |
| Photodegraded toluene     | 597    | 534                 | 235  | 384                   |
| Initial toluene           | 643    | 649                 | 636  | 639                   |
| $\eta_t$ , toluene (%)    | 93     | 82                  | 37   | 60                    |

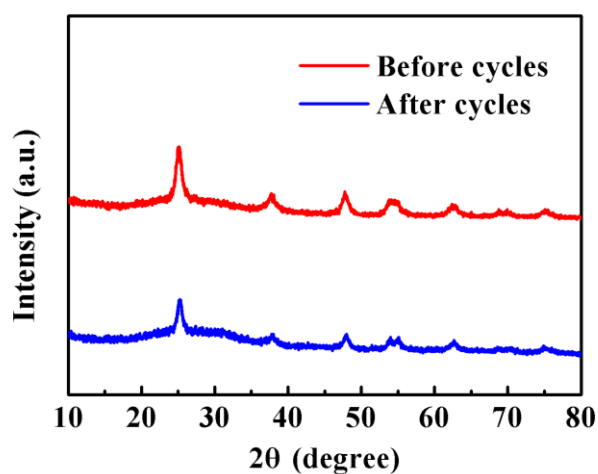

**Figure S2.** X-ray diffraction (XRD) of TCN IO

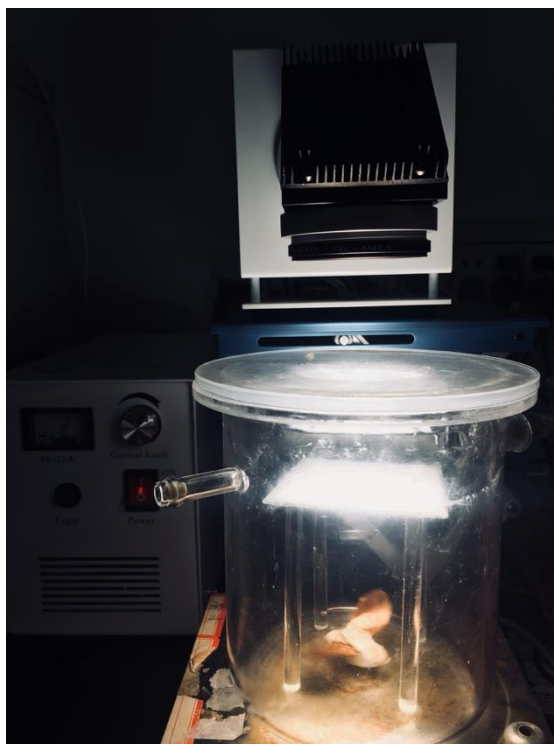

**Figure S3.** Reactor device
